# Supplementary material for: Tape-Strip Proteomic Profiling of Atopic Dermatitis on Dupilumab Identifies Minimally Invasive Biomarkers
Source: Front Immunol. 2020 Aug 6;11:1768. doi: 10.3389/fimmu.2020.01768 (PMC7423990; doi:10.3389/fimmu.2020.01768)
Supplement: Supplementary file 1 [file Data_Sheet_1.XLSX]

## Sheet: TableE2_BigTab.csv
Protein	log(FCH) NL Post-Rx versus Pre-Rx	FCH NL Post-Rx versus Pre-Rx	P-value NL Post-Rx versus Pre-Rx	FDR NL Post-Rx versus Pre-Rx	Status NL Post-Rx versus Pre-Rx	log(FCH) LS Post-Rx versus Pre-Rx	FCH LS Post-Rx versus Pre-Rx	P-value LS Post-Rx versus Pre-Rx	FDR LS Post-Rx versus Pre-Rx	Status LS Post-Rx versus Pre-Rx	log(FCH) Baseline LS vs. NL	FCH Baseline LS vs. NL	P-value Baseline LS vs. NL	FDR Baseline LS vs. NL	Status Baseline LS vs. NL	Percent Improvement from Baseline for LS
BMP6	0.11	1.08	0.296	0.4873	0	0.09	1.06	0.417	0.484	0	0.03	1.02	0.791	0.854	0	-303.91
ANGPT1	0.03	1.02	0.673	0.77926	0	-0.1	-1.07	0.224	0.29	0	0.18	1.14	0.0281	0.0436	0	54.36
ADM	-0.1	-1.07	0.155	0.35038	0	-0.19	-1.14	0.00453	0.0114	0	0.07	1.05	0.279	0.338	0	263.5
CD40LG	-0.15	-1.11	0.02	0.18317	0	-0.12	-1.09	0.0482	0.0802	0	0.01	1	0.93	0.948	0	2246.76
SLAMF7	-0.13	-1.09	0.189	0.39047	0	-0.15	-1.11	0.126	0.179	0	0.14	1.11	0.147	0.19	0	104.41
PGF	-0.15	-1.11	0.65	0.76064	0	-0.4	-1.32	0.23	0.297	0	1.59	3.01	6.54e-06	1.87e-05	1	25.12
ADAMTS13	-0.17	-1.12	0.0365	0.22088	0	-0.36	-1.28	1.3e-05	0.000106	0	0.22	1.17	0.0058	0.0097	0	160.8
BOC	-0.05	-1.04	0.266	0.46392	0	-0.03	-1.02	0.468	0.524	0	-0.08	-1.06	0.108	0.147	0	-44.47
IL4R	-0.1	-1.07	0.367	0.51901	0	-0.16	-1.12	0.15	0.207	0	0.39	1.31	0.000788	0.0015	0	41.46
SRC	-0.12	-1.09	0.559	0.68894	0	-0.15	-1.11	0.459	0.516	0	0.67	1.59	0.00166	0.00305	0	22.76
IL1RN	-0.16	-1.12	0.0303	0.21037	0	-0.12	-1.08	0.106	0.155	0	0	1	0.981	0.985	0	6776.32
IL6	-0.16	-1.12	0.277	0.47666	0	-0.84	-1.79	5.33e-08	2.79e-06	0	0.74	1.67	1.53e-06	5.59e-06	0	113.76
TNFRSF10A	-0.23	-1.18	0.115	0.33032	0	-0.75	-1.68	1.49e-06	2.6e-05	0	0.93	1.9	8.73e-09	3.2e-07	0	80.61
STK4	0.06	1.04	0.69	0.78323	0	-0.26	-1.2	0.0781	0.12	0	0.44	1.36	0.00406	0.00691	0	59.85
IDUA	0.49	1.4	0.0123	0.15024	0	0.37	1.29	0.0541	0.0888	0	0.32	1.25	0.094	0.131	0	-113.95
TNFRSF11A	0.03	1.02	0.689	0.78323	0	-0.04	-1.03	0.62	0.68	0	0.3	1.23	0.000733	0.00141	0	14.1
F2R	-0.01	-1.01	0.858	0.88218	0	-0.07	-1.05	0.329	0.397	0	0.12	1.09	0.0997	0.137	0	58.32
TNFRSF10B	-0.2	-1.15	0.327	0.4967	0	-0.95	-1.93	6.98e-06	6.79e-05	0	1.36	2.56	1.11e-09	1.89e-07	1	69.82
PRSS27	-0.65	-1.56	0.23	0.42247	0	-1.13	-2.19	0.0352	0.0619	0	2.55	5.87	6.04e-06	1.74e-05	1	44.2
TEK	-0.02	-1.01	0.709	0.79316	0	-0.1	-1.08	0.0445	0.075	0	0.08	1.06	0.123	0.163	0	129.44
F3	-0.31	-1.24	0.173	0.36954	0	-0.37	-1.29	0.108	0.157	0	0.72	1.65	0.00213	0.00382	0	50.93
IL1RL2	-0.14	-1.1	0.459	0.60375	0	-0.22	-1.16	0.231	0.297	0	0.83	1.77	1.93e-05	5.02e-05	0	26.56
PDGFB	-0.11	-1.08	0.304	0.48903	0	-0.45	-1.37	2.95e-05	0.000196	0	0.44	1.36	4.57e-05	0.000107	0	101.52
IL27	0.02	1.02	0.689	0.78323	0	0.06	1.04	0.29	0.361	0	0.06	1.04	0.333	0.398	0	-108.18
IL17D	-0.08	-1.06	0.236	0.42532	0	-0.13	-1.09	0.0623	0.0997	0	0.08	1.06	0.253	0.311	0	162.25
CXCL1	-1.01	-2.02	0.0986	0.31932	0	-2.05	-4.14	0.00093	0.00315	-1	3.11	8.62	1.51e-06	5.57e-06	1	65.98
OLR1	-0.8	-1.74	0.147	0.35038	0	-1.94	-3.85	0.000523	0.00201	-1	2.99	7.92	3.67e-07	1.98e-06	1	65.11
LGALS9	-0.62	-1.54	0.118	0.33365	0	-1.11	-2.16	0.00504	0.0124	-1	2.05	4.14	9.03e-07	3.67e-06	1	54.18
GIF	-0.03	-1.02	0.729	0.80819	0	-0.11	-1.08	0.152	0.208	0	0.13	1.09	0.111	0.15	0	88.94
KITLG	-0.05	-1.04	0.448	0.59832	0	-0.16	-1.11	0.0176	0.0349	0	0.11	1.08	0.0955	0.132	0	141.75
IL18	-0.75	-1.69	0.292	0.4873	0	-1.01	-2.01	0.155	0.211	0	3.24	9.43	1.55e-05	4.11e-05	1	31.18
FGF21	-0.03	-1.02	0.675	0.77926	0	0.08	1.05	0.319	0.39	0	-0.06	-1.04	0.461	0.534	0	133.86
PIGR	0.37	1.29	0.105	0.31932	0	0.1	1.07	0.663	0.717	0	0.37	1.29	0.1	0.137	0	-26.08
AGER	-0.26	-1.2	0.378	0.52771	0	-1.08	-2.12	0.000386	0.00152	-1	1.77	3.4	4.46e-08	5.08e-07	1	61.37
SOD2	-0.51	-1.42	0.145	0.35038	0	-0.95	-1.93	0.00629	0.0152	0	1.65	3.13	6.05e-06	1.74e-05	1	57.78
CTRC	-0.1	-1.07	0.597	0.72119	0	-0.06	-1.04	0.74	0.785	0	0.05	1.04	0.781	0.846	0	117.99
FGF23	-0.04	-1.03	0.617	0.73998	0	0	-1	0.955	0.966	0	-0.06	-1.04	0.504	0.575	0	-8.27
SPON2	0.16	1.11	0.148	0.35038	0	-0.16	-1.11	0.145	0.202	0	0.31	1.24	0.00477	0.00804	0	50.37
CSH1	-0.03	-1.02	0.765	0.81975	0	-0.33	-1.26	0.000685	0.00253	0	0.28	1.22	0.00342	0.00593	0	115.54
FST	-0.06	-1.04	0.81	0.85191	0	-0.78	-1.72	0.00268	0.00732	0	1.61	3.05	8.71e-09	3.2e-07	1	48.51
GLO1	-0.09	-1.06	0.845	0.87902	0	-0.59	-1.51	0.18	0.238	0	2.73	6.62	1.62e-08	3.79e-07	1	21.76
CD84	-0.08	-1.05	0.453	0.59969	0	-0.08	-1.06	0.424	0.488	0	-0.03	-1.02	0.802	0.856	0	-316.36
PAPPA	-0.04	-1.03	0.526	0.66773	0	-0.06	-1.04	0.35	0.415	0	0.01	1.01	0.866	0.906	0	551.01
SERPINA12	-0.02	-1.01	0.851	0.88108	0	-0.05	-1.03	0.566	0.624	0	-0.09	-1.07	0.267	0.326	0	-50.98
REN	0.18	1.14	0.0742	0.28865	0	0.22	1.17	0.0303	0.0542	0	0.29	1.23	0.00517	0.00868	0	-75.98
DECR1	0	1	0.994	0.99436	0	-0.48	-1.39	0.035	0.0619	0	1.05	2.07	9.26e-06	2.59e-05	1	45.24
MERTK	0	1	0.958	0.96334	0	-0.16	-1.12	0.0193	0.0375	0	0.1	1.07	0.149	0.193	0	161.8
HAVCR1	0.05	1.03	0.562	0.69059	0	0	-1	0.995	0.996	0	0.01	1	0.939	0.955	0	7.38
THBS2	-0.06	-1.04	0.648	0.76033	0	-0.27	-1.21	0.0252	0.0465	0	0.53	1.44	3.03e-05	7.56e-05	0	51.45
THBD	-0.55	-1.47	0.0883	0.30781	0	-1.54	-2.9	4.48e-06	5.29e-05	-1	2.1	4.28	2.58e-09	1.89e-07	1	73.37
VSIG2	-0.08	-1.06	0.314	0.4967	0	0.04	1.03	0.625	0.683	0	0.16	1.12	0.042	0.0627	0	-23.51
AMBP	-0.33	-1.25	0.103	0.31932	0	-0.92	-1.9	7.94e-06	7.45e-05	0	0.86	1.82	3.16e-05	7.81e-05	0	106.84
PRELP	0.08	1.06	0.566	0.69194	0	-0.44	-1.36	0.00126	0.00403	0	0.65	1.57	5.72e-06	1.72e-05	0	68.49
HMOX1	-0.02	-1.02	0.948	0.95578	0	-0.82	-1.77	0.0245	0.0454	0	2.04	4.1	1.96e-07	1.23e-06	1	40.44
XCL1	0.03	1.02	0.559	0.68894	0	-0.12	-1.09	0.00706	0.0165	0	0.14	1.1	0.00334	0.00582	0	90.46
IL16	-0.85	-1.8	0.0343	0.22041	0	-1.86	-3.63	7.05e-06	6.79e-05	-1	2.18	4.54	2.83e-07	1.59e-06	1	85.15
SORT1	-0.37	-1.29	0.21	0.40585	0	-0.71	-1.63	0.0152	0.0311	0	1.53	2.88	7.7e-07	3.28e-06	1	46.34
CEACAM8	-0.42	-1.34	0.3	0.48903	0	-1.49	-2.81	0.000279	0.00117	-1	2.11	4.33	7.58e-07	3.26e-06	1	70.61
PTX3	-0.08	-1.06	0.607	0.73046	0	-0.6	-1.52	0.000256	0.00109	0	0.92	1.89	1.1e-07	7.61e-07	0	65.57
SELPLG	0	1	0.98	0.98224	0	-0.13	-1.1	0.0531	0.0876	0	0.21	1.16	0.00221	0.00395	0	61.62
CCL17	-2.42	-5.35	3.6e-06	0.00132	-1	-3.27	-9.67	1.12e-09	4.09e-07	-1	2.3	4.91	9.8e-06	2.7e-05	1	142.54
CCL3	-1.48	-2.78	0.00219	0.07278	0	-2.68	-6.43	8.31e-08	3.37e-06	-1	2.33	5.01	2.94e-06	9.51e-06	1	115.38
MMP7	-0.08	-1.06	0.738	0.80917	0	-0.37	-1.29	0.139	0.195	0	0.45	1.37	0.0722	0.103	0	81.09
FCGR2B	-0.17	-1.12	0.344	0.50416	0	-0.6	-1.51	0.000779	0.00282	0	0.65	1.57	0.000312	0.000637	0	91.75
ITGB1BP2	-0.02	-1.01	0.784	0.83399	0	-0.01	-1.01	0.859	0.883	0	-0.01	-1.01	0.865	0.906	0	-102.95
DCN	0.03	1.02	0.845	0.87902	0	-0.04	-1.02	0.836	0.865	0	0.31	1.24	0.0735	0.104	0	11.34
DKK1	-0.41	-1.33	0.0049	0.10464	0	-0.35	-1.27	0.0145	0.0299	0	0.1	1.07	0.483	0.555	0	348.94
LPL	-0.26	-1.2	0.0432	0.22609	0	-0.34	-1.27	0.00732	0.0169	0	0.24	1.18	0.0625	0.0903	0	143.66
PRSS8	-0.67	-1.59	0.0153	0.1616	0	-0.7	-1.62	0.0111	0.0237	0	1.06	2.08	0.000195	0.000405	1	66.16
AGRP	0.04	1.03	0.331	0.4967	0	0.01	1.01	0.847	0.874	0	0.01	1.01	0.742	0.811	0	-57.76
HBEGF	-0.5	-1.41	0.215	0.40585	0	-1.6	-3.04	9.57e-05	0.000515	-1	2.46	5.51	1.45e-08	3.79e-07	1	65.17
GDF2	-0.15	-1.11	0.175	0.36954	0	-0.21	-1.16	0.0456	0.0762	0	0.22	1.16	0.0418	0.0627	0	97.07
FABP2	-0.06	-1.04	0.317	0.4967	0	-0.19	-1.14	0.00203	0.00586	0	0.09	1.07	0.133	0.175	0	206.91
THPO	0.16	1.12	0.0511	0.22657	0	0.01	1.01	0.864	0.886	0	-0.04	-1.02	0.669	0.74	0	39.58
MARCO	-0.25	-1.19	0.00895	0.12602	0	-0.32	-1.25	0.000869	0.00297	0	0.19	1.14	0.0441	0.0657	0	166.47
FABP6	-0.18	-1.13	0.154	0.35038	0	0.13	1.09	0.306	0.378	0	0.21	1.16	0.0931	0.13	0	-60.06
NPPB	-0.11	-1.08	0.0513	0.22657	0	-0.08	-1.05	0.154	0.21	0	-0.07	-1.05	0.181	0.228	0	-105.35
MMP12	-2.44	-5.44	8.1e-06	0.00148	-1	-3.19	-9.15	1.12e-08	1.82e-06	-1	2.08	4.23	0.000118	0.000253	1	153.48
ACE2	0.03	1.02	0.638	0.75675	0	-0.07	-1.05	0.32	0.39	0	0.2	1.15	0.00768	0.0125	0	36.35
PDCD1LG2	-0.08	-1.06	0.147	0.35038	0	-0.06	-1.04	0.309	0.381	0	0	-1	0.95	0.963	0	-1604.78
CTSL	0.25	1.19	0.109	0.31932	0	0.29	1.22	0.0638	0.101	0	0.14	1.1	0.384	0.45	0	-211.76
OSCAR	-0.24	-1.18	0.164	0.36466	0	-0.87	-1.83	1.66e-06	2.76e-05	0	1.12	2.18	3.59e-09	2.02e-07	1	77.84
TNFRSF13B	-0.11	-1.08	0.383	0.53089	0	-0.55	-1.46	1.15e-05	9.89e-05	0	0.61	1.52	1.98e-06	6.96e-06	0	90.45
TGM2	-0.35	-1.27	0.215	0.40585	0	-1.02	-2.02	0.000337	0.00135	-1	1.37	2.59	2.75e-06	9.05e-06	1	73.87
LEP	-0.26	-1.2	0.00964	0.12892	0	-0.16	-1.12	0.102	0.151	0	-0.11	-1.08	0.272	0.331	0	-147.49
CA5A	-0.24	-1.18	0.00543	0.10464	0	-0.14	-1.1	0.0935	0.139	0	-0.14	-1.1	0.0987	0.136	0	-100.46
HSPB1	-0.86	-1.82	0.0491	0.22657	0	-1.27	-2.41	0.00371	0.00984	-1	1.71	3.28	0.000136	0.000286	1	74.05
CD4	-0.57	-1.48	0.0425	0.22609	0	-0.97	-1.95	0.00063	0.00235	0	1.38	2.6	2.7e-06	9.05e-06	1	70.17
IKBKG	-0.49	-1.41	0.14	0.35038	0	-0.88	-1.85	0.00824	0.0186	0	1.79	3.47	4.2e-07	2.18e-06	1	49.25
FIGF	-0.21	-1.16	0.000586	0.03575	0	-0.24	-1.18	8.94e-05	0.000496	0	0.05	1.04	0.365	0.432	0	443.35
PARP1	-0.51	-1.42	0.034	0.22041	0	-1.29	-2.44	2.93e-07	6.31e-06	-1	1.44	2.72	2.1e-08	3.79e-07	1	89.3
HAO1	0.06	1.04	0.304	0.48903	0	-0.09	-1.07	0.108	0.157	0	0.01	1.01	0.793	0.854	0	610.39
TNFRSF14	-0.22	-1.17	0.33	0.4967	0	-0.58	-1.5	0.0114	0.0242	0	1.21	2.31	7.92e-07	3.29e-06	1	48.39
LDLR	-0.71	-1.63	0.0529	0.22657	0	-1.17	-2.25	0.00146	0.00455	-1	2.13	4.39	4.58e-08	5.08e-07	1	54.74
ITGB2	-1.65	-3.14	0.00107	0.04884	-1	-2.41	-5.32	2.55e-06	3.6e-05	-1	2.44	5.42	2.58e-06	8.83e-06	1	98.93
IL17RA	-0.76	-1.69	0.0482	0.22657	0	-1.78	-3.44	6.55e-06	6.66e-05	-1	2.31	4.96	1.93e-08	3.79e-07	1	77.07
TNFRSF1B	-0.65	-1.57	0.0757	0.28865	0	-1.38	-2.6	0.000194	0.000849	-1	1.96	3.9	3.67e-07	1.98e-06	1	70.29
MMP9	-1.04	-2.06	0.042	0.22609	0	-1.95	-3.87	0.000167	0.000765	-1	2.73	6.64	4.19e-07	2.18e-06	1	71.44
EPHB4	-0.32	-1.24	0.151	0.35038	0	-0.57	-1.48	0.0101	0.022	0	1.16	2.24	5.73e-07	2.69e-06	1	48.57
IL2RA	-0.22	-1.16	0.454	0.59969	0	-0.85	-1.8	0.00393	0.0103	0	1.24	2.37	4.41e-05	0.000104	1	68.36
TNFRSF11B	-0.2	-1.15	0.367	0.51901	0	-0.8	-1.75	0.000385	0.00152	0	1.33	2.51	2.97e-08	4e-07	1	60.46
ALCAM	-0.68	-1.6	0.0235	0.18819	0	-1.31	-2.48	1.94e-05	0.000148	-1	1.78	3.44	2.58e-08	3.79e-07	1	73.42
TFF3	0.07	1.05	0.738	0.80917	0	-0.02	-1.02	0.904	0.925	0	0.06	1.04	0.766	0.832	0	39.97
SELP	-0.62	-1.54	0.0245	0.18819	0	-1.64	-3.11	2.34e-08	2.14e-06	-1	1.67	3.18	1.84e-08	3.79e-07	1	98.03
CSTB	-0.13	-1.09	0.46	0.60375	0	-0.52	-1.43	0.00307	0.00833	0	0.88	1.85	1.41e-06	5.34e-06	0	58.5
CCL2	-0.44	-1.36	0.252	0.44396	0	-1.56	-2.95	7.46e-05	0.000426	-1	1.99	3.97	9.79e-07	3.9e-06	1	78.33
CD163	-1.17	-2.26	0.00264	0.07534	0	-2.14	-4.42	1.2e-07	3.37e-06	-1	2.21	4.63	7.33e-08	6.24e-07	1	97.01
LGALS3	-0.6	-1.51	0.0155	0.1616	0	-0.78	-1.71	0.00157	0.00476	0	0.97	1.95	0.000124	0.000262	0	80.46
GRN	-0.22	-1.16	0.214	0.40585	0	-0.43	-1.35	0.0145	0.0299	0	0.93	1.91	5.38e-07	2.59e-06	0	45.92
BLMH	-0.22	-1.16	0.0305	0.21037	0	-0.22	-1.16	0.0286	0.0515	0	-0.02	-1.01	0.877	0.914	0	-1415.06
HSPG2	-0.49	-1.4	0.0995	0.31932	0	-1.18	-2.27	9.17e-05	0.000501	-1	1.77	3.42	2.59e-08	3.79e-07	1	66.74
LTBR	-0.33	-1.26	0.299	0.48903	0	-0.82	-1.77	0.00958	0.0211	0	1.69	3.22	5.66e-07	2.69e-06	1	48.89
NOTCH3	-0.09	-1.06	0.692	0.78323	0	-0.59	-1.51	0.00712	0.0165	0	1.28	2.43	5.47e-08	5.71e-07	1	46.26
TIMP4	-0.39	-1.31	0.0467	0.22657	0	-0.91	-1.88	6.07e-06	6.53e-05	0	1.16	2.24	3.06e-08	4e-07	1	78.68
CNTN1	-0.6	-1.52	0.0586	0.2466	0	-0.78	-1.72	0.0134	0.0279	0	1.37	2.58	3.41e-05	8.39e-05	1	57.39
CDH5	-0.28	-1.21	0.0639	0.26546	0	-0.57	-1.48	0.000195	0.000849	0	0.47	1.38	0.00213	0.00382	0	121.27
TREML2	-0.19	-1.14	0.233	0.4238	0	-0.72	-1.64	1.59e-05	0.000127	0	0.82	1.76	1.49e-06	5.56e-06	0	87.64
FABP4	-0.07	-1.05	0.865	0.88694	0	-0.47	-1.38	0.282	0.353	0	1.31	2.47	0.00363	0.00627	1	35.94
TFPI	-0.67	-1.59	0.0247	0.18819	0	-1.22	-2.34	4.92e-05	0.000295	-1	1.77	3.4	2.46e-08	3.79e-07	1	69.34
SERPINE1	-0.21	-1.16	0.536	0.67196	0	-1.33	-2.52	0.000176	0.000797	-1	1.83	3.56	6.85e-07	3.02e-06	1	72.7
CCL24	0.11	1.08	0.799	0.84744	0	0.16	1.12	0.712	0.762	0	1.67	3.18	0.000221	0.000458	1	-9.55
TFRC	-0.59	-1.51	0.0838	0.30045	0	-1.14	-2.2	0.000957	0.00318	-1	2.04	4.11	2.55e-08	3.79e-07	1	55.7
TNFRSF10C	-0.62	-1.54	0.146	0.35038	0	-1.66	-3.15	0.000153	0.000729	-1	2.38	5.2	1.97e-07	1.23e-06	1	69.66
GDF15	0.2	1.15	0.428	0.57762	0	-0.07	-1.05	0.776	0.819	0	0.36	1.28	0.163	0.208	0	20.03
SELE	-1.35	-2.55	0.00192	0.07034	0	-2.49	-5.6	4.21e-08	2.57e-06	-1	2.44	5.43	9.1e-08	6.9e-07	1	101.83
AZU1	-1.02	-2.03	0.0274	0.20269	0	-1.44	-2.71	0.00192	0.00565	-1	1.66	3.16	0.00045	0.000895	1	86.85
DLK1	-0.19	-1.14	0.233	0.4238	0	-0.73	-1.66	1.28e-05	0.000106	0	0.74	1.67	1.21e-05	3.25e-05	0	98.56
SPON1	-0.08	-1.06	0.323	0.4967	0	-0.2	-1.15	0.0119	0.0248	0	0.17	1.12	0.0383	0.0586	0	120.69
MPO	-0.64	-1.56	0.0425	0.22609	0	-0.64	-1.56	0.0398	0.0684	0	0.64	1.56	0.0407	0.0612	0	99.31
CXCL16	-0.71	-1.64	0.0179	0.17248	0	-1.42	-2.68	3.95e-06	4.81e-05	-1	1.72	3.3	6.23e-08	6.16e-07	1	82.58
IL6R	-0.8	-1.74	0.0511	0.22657	0	-1.23	-2.35	0.00255	0.00706	-1	2.17	4.5	4.75e-07	2.38e-06	1	56.85
RETN	-0.95	-1.93	0.107	0.31932	0	-1.93	-3.81	0.00112	0.00365	-1	2.78	6.88	5.87e-06	1.74e-05	1	69.34
IGFBP1	-0.41	-1.33	0.128	0.34289	0	-1.06	-2.09	0.000123	0.000625	-1	1.28	2.44	6e-06	1.74e-05	1	82.66
CHIT1	-0.51	-1.42	0.329	0.4967	0	-1.59	-3.01	0.00258	0.0071	-1	2.48	5.59	6.01e-06	1.74e-05	1	63.97
ACP5	-0.48	-1.39	0.092	0.31471	0	-0.5	-1.41	0.0731	0.113	0	0.77	1.71	0.00667	0.011	0	64.65
GP6	0.02	1.01	0.759	0.81932	0	-0.07	-1.05	0.216	0.282	0	0.1	1.08	0.0804	0.113	0	69.64
SFTPD	-0.02	-1.02	0.931	0.94496	0	0.47	1.39	0.0724	0.113	0	0.49	1.4	0.0654	0.0943	0	-96.39
PI3	0.05	1.03	0.721	0.80477	0	-0.04	-1.03	0.743	0.786	0	-0.21	-1.16	0.117	0.156	0	-20.56
EPCAM	0.45	1.36	0.122	0.34014	0	-0.45	-1.37	0.112	0.161	0	1.64	3.11	9.71e-08	6.97e-07	1	27.58
ANPEP	-0.45	-1.37	0.0904	0.31205	0	-1.31	-2.48	1.95e-06	2.97e-05	-1	1.59	3.01	2.44e-08	3.79e-07	1	82.54
AXL	-0.54	-1.45	0.117	0.33365	0	-1.16	-2.23	0.000816	0.00287	-1	1.87	3.66	2.61e-07	1.52e-06	1	61.82
IL1R1	-0.04	-1.03	0.845	0.87902	0	-0.28	-1.22	0.183	0.24	0	0.91	1.88	4.2e-05	0.0001	0	30.98
MMP2	-0.17	-1.12	0.266	0.46392	0	-0.44	-1.35	0.00442	0.0113	0	0.54	1.45	0.000547	0.00107	0	80.64
FAS	-0.17	-1.12	0.645	0.75928	0	-0.69	-1.61	0.0553	0.0903	0	1.9	3.74	6.48e-07	2.93e-06	1	36.11
TNFSF13B	-0.28	-1.21	0.398	0.541	0	-1.12	-2.17	0.000799	0.00284	-1	2.25	4.76	4.63e-10	1.69e-07	1	49.57
PRTN3	-1.02	-2.02	0.0227	0.18819	0	-1.12	-2.18	0.0111	0.0237	-1	1.37	2.59	0.00236	0.0042	1	82.03
PCSK9	-0.26	-1.2	0.033	0.22041	0	-0.59	-1.51	2.89e-06	3.92e-05	0	0.6	1.52	2.67e-06	9.03e-06	0	98.49
PLAUR	-0.52	-1.43	0.174	0.36954	0	-1.13	-2.19	0.0031	0.00833	-1	2.1	4.29	2.01e-07	1.23e-06	1	53.71
SPP1	-0.5	-1.42	0.0383	0.22268	0	-1.07	-2.1	1.65e-05	0.000129	-1	0.99	1.99	7.01e-05	0.000158	0	107.86
CTSD	-0.04	-1.03	0.57	0.69353	0	-0.07	-1.05	0.355	0.42	0	-0.2	-1.15	0.0101	0.0163	0	-35.03
PGLYRP1	-0.89	-1.85	0.109	0.31932	0	-1.89	-3.69	0.000792	0.00284	-1	2.85	7.19	1.19e-06	4.64e-06	1	66.21
CPA1	-0.22	-1.16	0.321	0.4967	0	-0.72	-1.64	0.00127	0.00403	0	0.9	1.87	7.8e-05	0.000174	0	79.63
F11R	-0.21	-1.16	0.306	0.48903	0	-0.57	-1.48	0.0067	0.0159	0	1.24	2.37	3.01e-08	4e-07	1	45.59
LGALS4	-0.15	-1.11	0.339	0.50416	0	-0.4	-1.32	0.0106	0.0229	0	0.77	1.71	2.16e-06	7.54e-06	0	51.25
IL1R2	-0.34	-1.26	0.237	0.42537	0	-0.63	-1.54	0.0278	0.0503	0	1.26	2.4	2.14e-05	5.47e-05	1	49.52
SIRPA	-0.24	-1.18	0.392	0.53712	0	-0.86	-1.81	0.00246	0.00691	0	1.75	3.37	8.96e-09	3.2e-07	1	49.01
CCL15-CCL14	-0.57	-1.48	0.0397	0.22609	0	-1.18	-2.26	3.01e-05	0.000196	-1	1.76	3.38	3.87e-09	2.02e-07	1	67.01
CASP3	-0.41	-1.33	0.284	0.48276	0	-0.99	-1.98	0.0101	0.022	0	2.01	4.03	7.29e-07	3.18e-06	1	49.1
PLAU	-0.44	-1.35	0.172	0.36954	0	-1.05	-2.08	0.00113	0.00365	-1	1.84	3.59	7.72e-08	6.3e-07	1	57.21
CPB1	-0.31	-1.24	0.247	0.43741	0	-1.03	-2.04	0.00015	0.000723	-1	1.43	2.69	4.23e-07	2.18e-06	1	72.01
CHI3L1	-0.08	-1.06	0.24	0.42764	0	-0.1	-1.07	0.131	0.186	0	-0.09	-1.06	0.194	0.243	0	-115.16
IL1RL1	-1.42	-2.68	0.023	0.18819	0	-2.58	-6	5.04e-05	0.000297	-1	3.79	13.82	1.63e-08	3.79e-07	1	68.22
PLAT	-1.38	-2.6	0.0366	0.22088	0	-1.73	-3.33	0.00828	0.0186	-1	2.61	6.09	0.000119	0.000256	1	66.54
SCGB3A2	-0.01	-1.01	0.932	0.94496	0	-0.5	-1.42	0.0041	0.0107	0	0.62	1.53	0.000588	0.00113	0	81.83
EGFR	-0.02	-1.01	0.906	0.92344	0	-0.12	-1.09	0.47	0.524	0	0.19	1.14	0.255	0.312	0	62.67
IGFBP7	-0.19	-1.14	0.433	0.5831	0	-0.7	-1.62	0.00506	0.0124	0	1.39	2.63	1.41e-07	9.39e-07	1	50.06
CD93	-1.46	-2.75	0.0053	0.10464	0	-2.53	-5.78	2.42e-06	3.55e-05	-1	2.96	7.8	7.91e-08	6.3e-07	1	85.36
IL18BP	-0.46	-1.38	0.0176	0.17248	0	-0.81	-1.75	4.1e-05	0.000254	0	0.94	1.92	3.26e-06	1.05e-05	0	86.1
COL1A1	-0.12	-1.09	0.547	0.67865	0	-0.42	-1.34	0.0379	0.0661	0	1.01	2.01	2.74e-06	9.05e-06	1	41.86
PON3	-0.23	-1.17	0.16	0.3564	0	-0.46	-1.38	0.0046	0.0115	0	0.65	1.57	0.000112	0.000242	0	71.27
CTSZ	-0.24	-1.18	0.305	0.48903	0	-0.73	-1.65	0.00232	0.00658	0	1.4	2.64	3.67e-08	4.63e-07	1	51.85
MMP3	-1.69	-3.23	0.000799	0.04179	-1	-2.15	-4.43	2.25e-05	0.000165	-1	2.08	4.23	4.56e-05	0.000107	1	103.14
RARRES2	-0.79	-1.72	0.0431	0.22609	0	-1.35	-2.55	0.000562	0.00214	-1	1.87	3.65	4.12e-06	1.28e-05	1	72.33
ICAM2	-0.33	-1.26	0.0145	0.1616	0	-0.68	-1.6	1.36e-06	2.5e-05	0	0.61	1.52	1.57e-05	4.12e-05	0	111.9
KLK6	-0.62	-1.54	0.0719	0.28286	0	-0.8	-1.74	0.0204	0.039	0	1.39	2.63	9.89e-05	0.000219	1	57.44
PDGFA	-0.11	-1.08	0.293	0.4873	0	-0.19	-1.14	0.053	0.0876	0	0.43	1.34	4.23e-05	0.0001	0	45.22
TNFRSF1A	-0.5	-1.41	0.197	0.39593	0	-1.13	-2.19	0.00343	0.00916	-1	2.33	5.01	1.96e-08	3.79e-07	1	48.6
IGFBP2	-0.21	-1.16	0.527	0.66773	0	-1.05	-2.06	0.00211	0.00604	-1	1.78	3.43	6.56e-07	2.93e-06	1	58.78
VWF	-0.6	-1.52	0.0178	0.17248	0	-1.19	-2.28	5.68e-06	6.3e-05	-1	1.39	2.62	2.24e-07	1.33e-06	1	85.29
PECAM1	-1.28	-2.43	0.000482	0.03575	-1	-2.01	-4.02	1.16e-07	3.37e-06	-1	2.07	4.21	6.6e-08	6.24e-07	1	96.73
MEPE	-0.2	-1.15	0.0478	0.22657	0	-0.46	-1.38	1.1e-05	9.89e-05	0	0.44	1.35	3.48e-05	8.48e-05	0	105.59
CCL16	-0.66	-1.58	0.0373	0.22088	0	-1.35	-2.56	3.12e-05	0.000197	-1	1.96	3.9	9.61e-09	3.2e-07	1	68.96
IL8	-1.63	-3.08	0.0112	0.1408	0	-2.54	-5.8	8.93e-05	0.000496	-1	2.93	7.61	9.7e-06	2.69e-05	1	86.64
VEGFA	-0.47	-1.39	0.191	0.39212	0	-1.16	-2.23	0.00148	0.00455	-1	2.08	4.24	7.04e-08	6.24e-07	1	55.54
CD8A	-0.09	-1.06	0.172	0.36954	0	-0.13	-1.1	0.0378	0.0661	0	0	1	0.963	0.973	0	4420.4
CCL7	-0.11	-1.08	0.389	0.53669	0	-0.28	-1.21	0.0271	0.0495	0	0.39	1.31	0.00248	0.00438	0	71.47
GDNF	-0.12	-1.09	0.154	0.35038	0	-0.2	-1.15	0.0187	0.0365	0	0.16	1.12	0.0607	0.0882	0	124.63
CDCP1	-0.12	-1.09	0.633	0.75515	0	-0.82	-1.76	0.00149	0.00455	0	1.66	3.15	2.36e-09	1.89e-07	1	49.26
CD244	-0.2	-1.15	0.0858	0.30202	0	-0.42	-1.34	0.000327	0.00133	0	0.42	1.34	0.000364	0.000736	0	99.69
IL7	-0.03	-1.02	0.534	0.67159	0	-0.08	-1.06	0.0584	0.0946	0	0	1	0.925	0.946	0	2018.25
TGFB1	-0.31	-1.24	0.144	0.35038	0	-0.56	-1.47	0.0088	0.0195	0	1.08	2.12	1.61e-06	5.84e-06	1	51.84
IL17C	-0.36	-1.28	0.204	0.40149	0	-1.14	-2.2	6.96e-05	0.000404	-1	1.53	2.89	2.79e-07	1.59e-06	1	74.53
IL17A	-0.16	-1.12	0.0519	0.22657	0	-0.19	-1.14	0.0207	0.0392	0	0.21	1.16	0.0138	0.0219	0	92.79
CXCL11	-0.08	-1.05	0.727	0.80819	0	-0.24	-1.18	0.264	0.335	0	0.58	1.49	0.00967	0.0157	0	42.15
AXIN1	-0.12	-1.09	0.235	0.42532	0	-0.17	-1.13	0.0848	0.129	0	0.3	1.23	0.00365	0.00627	0	57.83
TNFSF10	-0.15	-1.11	0.645	0.75928	0	-0.26	-1.2	0.423	0.488	0	0.17	1.13	0.601	0.673	0	151.97
IL20RA	-0.02	-1.02	0.695	0.78323	0	-0.05	-1.04	0.404	0.473	0	0.09	1.06	0.157	0.201	0	58.05
CXCL9	-0.14	-1.1	0.708	0.79316	0	-0.39	-1.31	0.29	0.361	0	1.31	2.49	0.000562	0.00109	1	29.52
CST5	0.16	1.12	0.479	0.62014	0	0.09	1.06	0.705	0.757	0	0.06	1.04	0.808	0.86	0	-154.21
IL2RB	-0.04	-1.03	0.45	0.59832	0	-0.09	-1.07	0.11	0.157	0	-0.03	-1.02	0.575	0.647	0	-283.96
IL1A	0.29	1.22	0.282	0.48276	0	0.63	1.54	0.0196	0.0378	0	-0.85	-1.8	0.00197	0.00359	0	73.78
OSM	-0.57	-1.49	0.178	0.37321	0	-1.64	-3.12	0.000161	0.000757	-1	2.44	5.44	8.97e-08	6.9e-07	1	67.26
IL2	-0.1	-1.07	0.15	0.35038	0	-0.15	-1.11	0.0298	0.0535	0	0.01	1.01	0.91	0.938	0	1924.27
TSLP	-0.16	-1.11	0.224	0.41555	0	-0.13	-1.09	0.315	0.387	0	0.25	1.19	0.0578	0.0846	0	51.97
CCL4L1	-0.89	-1.86	0.00803	0.12554	0	-1.75	-3.36	5.67e-07	1.15e-05	-1	1.62	3.08	3.56e-06	1.11e-05	1	107.67
CD6	-0.13	-1.09	0.21	0.40585	0	-0.39	-1.31	0.000207	0.00089	0	0.44	1.36	3.64e-05	8.83e-05	0	88.13
SLAMF1	-0.14	-1.1	0.0481	0.22657	0	-0.1	-1.07	0.168	0.226	0	-0.08	-1.06	0.242	0.299	0	-116.71
TGFA	-0.32	-1.24	0.329	0.4967	0	-0.99	-1.98	0.00255	0.00706	0	1.87	3.66	7.17e-08	6.24e-07	1	52.66
CCL13	-1.24	-2.36	0.00162	0.0659	0	-2.33	-5.03	1.49e-08	1.82e-06	-1	1.78	3.43	1.04e-05	2.81e-05	1	131.16
CCL11	-0.08	-1.06	0.346	0.50416	0	-0.34	-1.26	0.000101	0.000537	0	0.26	1.2	0.00254	0.00447	0	129.28
TNFSF14	-0.22	-1.17	0.369	0.51945	0	-0.86	-1.82	0.000572	0.00216	0	1.31	2.49	4.91e-07	2.43e-06	1	65.44
IL10RA	-0.04	-1.03	0.367	0.51901	0	-0.04	-1.03	0.322	0.392	0	-0.01	-1.01	0.734	0.804	0	-288.63
FGF5	-0.07	-1.05	0.17	0.36954	0	-0.09	-1.07	0.0718	0.113	0	-0.01	-1.01	0.861	0.905	0	-1021.19
MMP1	-1.09	-2.12	0.0771	0.29104	0	-2.4	-5.29	0.000125	0.000625	-1	3.39	10.51	2.06e-07	1.24e-06	1	70.8
LIFR	0.1	1.07	0.0408	0.22609	0	0.07	1.05	0.17	0.226	0	0.01	1.01	0.842	0.888	0	-685.89
CCL19	-0.28	-1.21	0.14	0.35038	0	-0.73	-1.66	0.000137	0.000667	0	0.75	1.69	0.000104	0.000228	0	97.04
IL15RA	0.3	1.23	0.172	0.36954	0	0.38	1.3	0.0862	0.13	0	-0.16	-1.12	0.458	0.534	0	229.89
IL10RB	0.07	1.05	0.294	0.4873	0	-0.04	-1.03	0.564	0.623	0	0.12	1.09	0.0683	0.098	0	31.09
IL22RA1	-0.2	-1.15	0.367	0.51901	0	-0.16	-1.12	0.45	0.508	0	0.93	1.9	4.22e-05	0.0001	0	17.53
IL18R1	-0.07	-1.05	0.754	0.81932	0	-0.51	-1.42	0.0241	0.0451	0	1.28	2.43	1.07e-07	7.52e-07	1	39.56
CD274	-0.51	-1.42	0.0372	0.22088	0	-1.17	-2.25	3.3e-06	4.31e-05	-1	1.29	2.44	4.98e-07	2.43e-06	1	90.63
NGF	0.02	1.02	0.567	0.69194	0	0.08	1.06	0.0451	0.0757	0	-0.12	-1.08	0.0061	0.0102	0	71.63
CXCL5	-0.09	-1.07	0.737	0.80917	0	-0.76	-1.7	0.00707	0.0165	0	1.14	2.2	0.000102	0.000225	1	67.21
TNFSF11	-0.25	-1.19	0.0532	0.22657	0	-0.36	-1.29	0.00542	0.0132	0	0.58	1.5	1.88e-05	4.93e-05	0	62.58
HGF	-0.07	-1.05	0.783	0.83399	0	-0.68	-1.6	0.0113	0.024	0	1.53	2.89	9.41e-08	6.9e-07	1	44.38
IL24	-0.21	-1.15	0.1	0.31932	0	0.01	1	0.955	0.966	0	-0.17	-1.13	0.174	0.22	0	4.11
IL13	-0.1	-1.07	0.462	0.60414	0	-0.12	-1.09	0.348	0.415	0	0.27	1.21	0.0406	0.0612	0	44.97
ARTN	-0.09	-1.06	0.204	0.40149	0	-0.01	-1.01	0.83	0.863	0	-0.1	-1.07	0.161	0.206	0	-15.1
MMP10	-0.18	-1.13	0.639	0.75675	0	-1.82	-3.53	5.67e-06	6.3e-05	-1	2.28	4.85	4.15e-08	4.9e-07	1	79.85
IL10	-0.05	-1.03	0.394	0.53858	0	-0.04	-1.03	0.433	0.493	0	0.01	1.01	0.802	0.856	0	309.42
TNF	-0.24	-1.18	0.173	0.36954	0	-0.78	-1.71	2.58e-05	0.000175	0	0.94	1.91	7.82e-07	3.29e-06	0	82.8
CCL23	-0.25	-1.19	0.12	0.33729	0	-0.88	-1.84	1.57e-07	3.96e-06	0	0.93	1.91	5.03e-08	5.42e-07	0	94.61
CD5	-0.74	-1.67	0.00847	0.12554	0	-1.2	-2.3	2.5e-05	0.000175	-1	1.3	2.46	7.04e-06	2e-05	1	92.19
FLT3LG	0.04	1.03	0.755	0.81932	0	-0.36	-1.28	0.00819	0.0186	0	0.5	1.41	0.000387	0.000778	0	72.65
CXCL6	-0.7	-1.63	0.196	0.39581	0	-1.76	-3.38	0.00136	0.00428	-1	2.65	6.29	3.46e-06	1.1e-05	1	66.32
CXCL10	-0.2	-1.15	0.677	0.77932	0	-0.78	-1.72	0.0985	0.145	0	1.9	3.73	0.000123	0.000262	1	41.3
EIF4EBP1	-0.38	-1.3	0.391	0.53712	0	-0.83	-1.77	0.0624	0.0997	0	2.58	5.99	6.85e-08	6.24e-07	1	32.01
IL20	-0.07	-1.05	0.152	0.35038	0	-0.13	-1.09	0.0118	0.0248	0	0.05	1.03	0.356	0.423	0	273.43
SIRT2	-0.23	-1.18	0.341	0.50416	0	-0.35	-1.28	0.146	0.203	0	0.88	1.84	0.000466	0.000921	0	40.04
CCL28	-0.15	-1.11	0.0646	0.26546	0	-0.27	-1.2	0.00148	0.00455	0	0.3	1.23	0.000526	0.00104	0	90.23
DNER	0.26	1.2	0.272	0.47038	0	0.09	1.06	0.705	0.757	0	0.49	1.4	0.0396	0.0602	0	-18
S100A12	-0.49	-1.4	0.128	0.34289	0	-1.02	-2.03	0.00159	0.00477	-1	1.55	2.93	4.18e-06	1.29e-05	1	65.95
CD40	-1.72	-3.3	0.000535	0.03575	-1	-2.47	-5.54	1.12e-06	2.16e-05	-1	2.27	4.83	7.72e-06	2.17e-05	1	108.66
IL33	-0.17	-1.13	0.00635	0.11146	0	-0.28	-1.21	2.05e-05	0.000153	0	0.12	1.09	0.0504	0.0746	0	223.08
IFNG	-0.21	-1.16	0.216	0.40585	0	-0.09	-1.06	0.591	0.65	0	-0.1	-1.07	0.549	0.621	0	-88.76
FGF19	-0.12	-1.09	0.178	0.37321	0	-0.35	-1.27	0.000164	0.000761	0	0.27	1.2	0.00382	0.00654	0	130.74
IL4	0.04	1.03	0.53	0.66916	0	-0.05	-1.04	0.46	0.517	0	0.04	1.03	0.604	0.674	0	140.7
LIF	0.02	1.01	0.852	0.88108	0	-0.04	-1.03	0.696	0.751	0	0.23	1.17	0.0208	0.0326	0	16.52
NRTN	0.01	1.01	0.807	0.85191	0	0	-1	0.99	0.996	0	-0.01	-1	0.886	0.919	0	-8.53
CCL8	-0.19	-1.14	0.334	0.49885	0	-0.83	-1.78	4.37e-05	0.000267	0	0.86	1.82	2.9e-05	7.31e-05	0	96.45
CASP8	-0.39	-1.31	0.272	0.47038	0	-1.22	-2.32	0.000829	0.00289	-1	2.18	4.55	1.78e-08	3.79e-07	1	55.68
CCL25	-0.12	-1.09	0.143	0.35038	0	-0.13	-1.09	0.109	0.157	0	0	-1	0.983	0.985	0	-7483.37
CX3CL1	0.05	1.04	0.653	0.76153	0	0	-1	0.978	0.986	0	-0.01	-1.01	0.914	0.939	0	-24.75
TNFRSF9	-0.39	-1.31	0.217	0.40585	0	-0.69	-1.61	0.0267	0.049	0	1.41	2.66	1.49e-05	3.99e-05	1	48.89
NTF3	-0.02	-1.02	0.765	0.81975	0	-0.12	-1.09	0.135	0.19	0	0.08	1.06	0.31	0.372	0	145.93
TNFSF12	0.17	1.12	0.382	0.53089	0	-0.05	-1.03	0.806	0.841	0	0.98	1.97	1.7e-06	6.04e-06	0	4.78
CCL20	-0.63	-1.55	0.289	0.48659	0	-0.79	-1.73	0.183	0.24	0	2.4	5.28	0.000109	0.000237	1	32.91
SULT1A1	-0.05	-1.04	0.766	0.81975	0	-0.98	-1.97	1.18e-07	3.37e-06	0	0.95	1.94	2.93e-07	1.63e-06	0	102.61
STAMBP	-0.18	-1.13	0.48	0.62014	0	-0.45	-1.36	0.0786	0.12	0	1.48	2.79	7.33e-08	6.24e-07	1	30.26
IL5	-0.12	-1.08	0.0832	0.30045	0	-0.07	-1.05	0.274	0.346	0	0.01	1.01	0.883	0.918	0	736.52
ADA	0.31	1.24	0.192	0.39212	0	0.19	1.14	0.425	0.488	0	0.43	1.35	0.0698	0.0997	0	-43.22
LTA	0.02	1.01	0.858	0.88218	0	-0.04	-1.03	0.653	0.71	0	0.19	1.14	0.033	0.0507	0	20.6
CSF1	-0.41	-1.33	0.151	0.35038	0	-0.77	-1.71	0.00702	0.0165	0	1.49	2.81	8.28e-07	3.41e-06	1	51.81
NMNAT1	0.36	1.29	0.377	0.52771	0	-0.14	-1.1	0.727	0.773	0	1.32	2.5	0.00177	0.00323	1	10.8
NRP2	-0.2	-1.15	0.0246	0.18819	0	-0.18	-1.13	0.0433	0.0738	0	0.15	1.11	0.103	0.14	0	122.92
MAPT	-0.15	-1.11	0.0792	0.29284	0	-0.01	-1	0.941	0.957	0	-0.04	-1.03	0.62	0.69	0	-14.79
CADM3	-0.16	-1.12	0.015	0.1616	0	0.03	1.02	0.627	0.683	0	-0.15	-1.11	0.0212	0.0332	0	20.61
UNC5C	-0.1	-1.07	0.545	0.67845	0	-0.29	-1.22	0.0641	0.102	0	0.34	1.27	0.0306	0.0472	0	84.37
VWC2	-0.21	-1.16	0.0064	0.11146	0	-0.14	-1.1	0.0747	0.115	0	-0.08	-1.06	0.304	0.367	0	-172.26
SIGLEC9	-0.63	-1.55	0.00858	0.12554	0	-1.31	-2.48	1.62e-07	3.96e-06	-1	1.33	2.52	1.47e-07	9.61e-07	1	98.49
CD300C	-0.28	-1.21	0.102	0.31932	0	-0.76	-1.7	1.13e-05	9.89e-05	0	0.8	1.74	5.58e-06	1.69e-05	0	95.25
EZR	-0.75	-1.68	0.0496	0.22657	0	-1.45	-2.73	0.000186	0.000832	-1	2.5	5.66	1.7e-09	1.89e-07	1	57.91
SMOC2	-0.26	-1.2	0.124	0.34205	0	-0.4	-1.32	0.0201	0.0386	0	0.57	1.48	0.00115	0.00215	0	69.78
MINOS1-NBL1	-0.22	-1.17	0.14	0.35038	0	-0.12	-1.09	0.405	0.473	0	0.41	1.33	0.00618	0.0102	0	29.59
EFNA4	-0.1	-1.07	0.421	0.57089	0	-0.07	-1.05	0.562	0.623	0	0.18	1.13	0.147	0.19	0	39.31
SCARB2	0.34	1.27	0.123	0.34029	0	0.26	1.2	0.232	0.297	0	0.49	1.41	0.0267	0.0416	0	-52.88
NCAN	-0.12	-1.09	0.106	0.31932	0	-0.05	-1.03	0.497	0.553	0	-0.05	-1.03	0.516	0.587	0	-103.49
PRTG	-0.12	-1.08	0.0495	0.22657	0	-0.05	-1.03	0.44	0.499	0	-0.08	-1.05	0.201	0.25	0	-59.57
ROBO2	-0.1	-1.07	0.0508	0.22657	0	-0.12	-1.09	0.0224	0.0423	0	-0.07	-1.05	0.2	0.25	0	-177.71
CRTAM	-0.1	-1.07	0.111	0.32134	0	-0.09	-1.06	0.169	0.226	0	-0.01	-1.01	0.905	0.936	0	-1149.36
RGMA	-0.16	-1.12	0.229	0.42247	0	-0.53	-1.45	0.000114	0.00059	0	0.44	1.36	0.00147	0.00271	0	121.37
PLXNB3	-0.07	-1.05	0.201	0.39914	0	-0.05	-1.04	0.324	0.392	0	-0.04	-1.03	0.465	0.537	0	-133.78
CPA2	-0.01	-1.01	0.944	0.95449	0	-0.15	-1.11	0.169	0.226	0	0.5	1.41	2.31e-05	5.87e-05	0	30.86
CD38	-0.42	-1.34	0.0832	0.30045	0	-1.13	-2.19	6.42e-06	6.66e-05	-1	1.16	2.23	5.03e-06	1.53e-05	1	97.64
SMPD1	-0.34	-1.26	0.207	0.40542	0	-0.38	-1.3	0.15	0.207	0	0.92	1.89	0.000829	0.00157	0	41.59
MSR1	-0.29	-1.22	0.0933	0.31606	0	-0.78	-1.72	1.16e-05	9.89e-05	0	0.85	1.8	2.88e-06	9.41e-06	0	92.02
LRPAP1	-0.76	-1.7	0.154	0.35038	0	-1.54	-2.92	0.00408	0.0107	-1	3.23	9.38	2.16e-08	3.79e-07	1	47.82
FRZB	-0.03	-1.02	0.736	0.80917	0	-0.15	-1.11	0.134	0.189	0	-0.02	-1.02	0.829	0.877	0	-690.31
EPHB6	-0.09	-1.07	0.464	0.60414	0	-0.14	-1.1	0.27	0.342	0	0.45	1.36	0.000553	0.00108	0	30.74
RGMB	-0.05	-1.03	0.633	0.75515	0	0	1	0.996	0.996	0	-0.18	-1.13	0.0815	0.114	0	0.25
SIGLEC1	-0.17	-1.12	0.0718	0.28286	0	-0.27	-1.2	0.00424	0.0109	0	0.15	1.11	0.102	0.14	0	175.5
CNTN5	-0.11	-1.08	0.0464	0.22657	0	-0.13	-1.09	0.0232	0.0435	0	-0.07	-1.05	0.244	0.301	0	-194.52
ADAM22	0.07	1.05	0.315	0.4967	0	-0.09	-1.07	0.179	0.238	0	0.04	1.03	0.576	0.647	0	238.31
CLEC1B	-0.16	-1.12	0.0981	0.31932	0	-0.28	-1.21	0.00445	0.0113	0	0	-1	0.985	0.985	0	-15167.3
ADAM23	-0.14	-1.1	0.105	0.31932	0	-0.02	-1.02	0.798	0.835	0	-0.18	-1.13	0.0395	0.0602	0	-12.16
MATN3	0.19	1.14	0.147	0.35038	0	-0.03	-1.02	0.791	0.831	0	0.35	1.27	0.00981	0.0159	0	10
RSPO1	-0.11	-1.08	0.201	0.39914	0	-0.14	-1.1	0.098	0.145	0	0.13	1.1	0.11	0.149	0	102.52
HAGH	-0.45	-1.37	0.193	0.39243	0	-0.84	-1.79	0.016	0.0324	0	1.94	3.84	1.87e-07	1.2e-06	1	43.28
LXN	0.24	1.18	0.138	0.35038	0	0.39	1.31	0.0166	0.0335	0	-0.24	-1.18	0.14	0.182	0	161.87
LGALS8	-0.53	-1.44	0.29	0.48659	0	-0.54	-1.45	0.277	0.349	0	1.38	2.61	0.00668	0.011	1	38.99
BCAN	-0.18	-1.13	0.0224	0.18819	0	-0.16	-1.12	0.0321	0.057	0	0.08	1.06	0.31	0.372	0	210.54
LAYN	-0.41	-1.33	0.0289	0.20714	0	-0.81	-1.76	2.49e-05	0.000175	0	0.78	1.72	5.82e-05	0.000133	0	104.12
MME	0.02	1.01	0.837	0.87797	0	-0.14	-1.1	0.0731	0.113	0	0.22	1.17	0.00429	0.00728	0	61.29
MSTN	-0.15	-1.11	0.18	0.37431	0	-0.14	-1.11	0.197	0.257	0	-0.08	-1.06	0.461	0.534	0	-173.52
THY1	-0.32	-1.24	0.104	0.31932	0	-0.71	-1.63	0.000317	0.0013	0	0.99	1.98	1.38e-06	5.33e-06	0	71.85
WFIKKN1	0.02	1.02	0.757	0.81932	0	-0.06	-1.04	0.428	0.488	0	-0.06	-1.04	0.383	0.45	0	-89.93
TMPRSS5	0.08	1.06	0.217	0.40585	0	0.05	1.04	0.428	0.488	0	-0.06	-1.04	0.378	0.446	0	88.92
CDH3	-0.34	-1.27	0.346	0.50416	0	-1.23	-2.34	0.00086	0.00297	-1	2.15	4.43	4.11e-08	4.9e-07	1	57.23
GFRA1	-0.05	-1.03	0.595	0.72119	0	-0.01	-1.01	0.919	0.937	0	0.15	1.11	0.114	0.153	0	6.34
CSF2RA	-0.43	-1.35	0.0689	0.27811	0	-0.56	-1.47	0.0183	0.036	0	0.78	1.72	0.00119	0.00221	0	71.11
SCARA5	-0.16	-1.12	0.211	0.40585	0	-0.05	-1.03	0.714	0.762	0	-0.03	-1.02	0.799	0.856	0	-142.39
CD200	-0.27	-1.21	0.0334	0.22041	0	-0.47	-1.39	0.000302	0.00126	0	0.46	1.38	0.000442	0.000885	0	101.89
NTRK2	-0.02	-1.01	0.81	0.85191	0	-0.16	-1.11	0.0273	0.0496	0	0.05	1.04	0.441	0.516	0	286.46
GZMA	-0.64	-1.56	0.0374	0.22088	0	-1.51	-2.85	1.89e-06	2.97e-05	-1	1.74	3.33	9.42e-08	6.9e-07	1	86.97
CSF3	0.19	1.14	0.109	0.31932	0	0.18	1.14	0.109	0.157	0	0.18	1.13	0.123	0.163	0	-102.69
DRAXIN	-0.05	-1.04	0.512	0.65491	0	-0.02	-1.01	0.792	0.831	0	-0.05	-1.04	0.484	0.556	0	-37.17
SCARF2	0.04	1.03	0.514	0.65612	0	-0.05	-1.04	0.413	0.481	0	0.1	1.07	0.115	0.154	0	51.19
GFRA3	-0.06	-1.04	0.322	0.4967	0	0.01	1.01	0.837	0.865	0	-0.09	-1.07	0.136	0.178	0	13.61
PVR	-0.06	-1.05	0.695	0.78323	0	-0.28	-1.21	0.089	0.133	0	0.62	1.53	0.000248	0.000511	0	44.71
TNFRSF12A	-0.06	-1.04	0.438	0.58719	0	-0.18	-1.14	0.0174	0.0346	0	0.14	1.1	0.077	0.109	0	133.83
ACVRL1	-0.13	-1.09	0.367	0.51901	0	-0.63	-1.55	2.56e-05	0.000175	0	0.72	1.65	2.39e-06	8.24e-06	0	87.22
FLRT2	0.02	1.01	0.68	0.77977	0	-0.05	-1.03	0.327	0.395	0	0	1	0.967	0.975	0	2362.54
CPM	-0.03	-1.02	0.742	0.81074	0	0.08	1.06	0.419	0.486	0	-0.25	-1.19	0.0119	0.0191	0	31.31
CLEC10A	-0.81	-1.75	0.00363	0.09483	0	-1.48	-2.8	2.68e-07	6.13e-06	-1	1.45	2.73	6.41e-07	2.93e-06	1	102.62
GPC5	-0.08	-1.06	0.107	0.31932	0	-0.09	-1.06	0.087	0.131	0	-0.03	-1.02	0.534	0.605	0	-273.97
BMP4	-0.04	-1.03	0.656	0.76253	0	-0.1	-1.07	0.295	0.366	0	-0.19	-1.14	0.056	0.0823	0	-53.83
FCRL2	-0.15	-1.11	0.0194	0.18217	0	-0.17	-1.12	0.00853	0.019	0	-0.12	-1.09	0.0518	0.0765	0	-134.79
MDGA1	-0.14	-1.1	0.0129	0.15234	0	-0.08	-1.06	0.157	0.212	0	-0.11	-1.08	0.0594	0.0866	0	-73.9
IL5RA	-0.19	-1.14	0.0979	0.31932	0	-0.21	-1.16	0.061	0.0983	0	-0.17	-1.13	0.13	0.171	0	-122.68
PDGFRA	-0.13	-1.09	0.127	0.34289	0	-0.24	-1.18	0.00447	0.0113	0	0.1	1.07	0.237	0.295	0	241.9
CTSC	-0.03	-1.02	0.87	0.88958	0	-0.57	-1.48	0.00758	0.0173	0	1.23	2.35	5.72e-08	5.81e-07	1	45.96
CDH6	-0.08	-1.06	0.158	0.35584	0	-0.12	-1.09	0.0444	0.075	0	-0.02	-1.02	0.716	0.786	0	-550.86
DDR1	-0.15	-1.11	0.35	0.50606	0	-0.28	-1.22	0.0723	0.113	0	0.54	1.46	0.000912	0.00172	0	52.56
JAM2	-0.13	-1.1	0.0277	0.20269	0	-0.25	-1.19	3.05e-05	0.000196	0	0.15	1.11	0.0113	0.0182	0	167.38
CTSS	0.37	1.29	0.132	0.34748	0	-0.22	-1.17	0.356	0.42	0	1.31	2.48	4.71e-07	2.38e-06	1	17.03
ASAH2	-0.15	-1.11	0.152	0.35038	0	-0.17	-1.13	0.0912	0.136	0	-0.25	-1.19	0.0188	0.0297	0	-70.61
NAAA	0.2	1.15	0.35	0.50606	0	-0.19	-1.14	0.357	0.42	0	0.63	1.55	0.00309	0.00541	0	30.2
ULBP2	-0.18	-1.13	0.543	0.67804	0	-0.32	-1.25	0.263	0.335	0	1.22	2.33	4.73e-05	0.00011	1	26.2
PLXNB1	-0.12	-1.08	0.489	0.63051	0	-0.3	-1.23	0.0714	0.113	0	0.7	1.62	7.32e-05	0.000164	0	43.56
TNFRSF21	-0.11	-1.08	0.132	0.34748	0	-0.18	-1.13	0.0191	0.0371	0	0.24	1.18	0.00211	0.00382	0	74.67
CD300LF	-0.44	-1.36	0.141	0.35038	0	-1.17	-2.24	0.000127	0.000627	-1	1.52	2.86	1.42e-06	5.34e-06	1	76.88
SPOCK1	-0.3	-1.23	0.000468	0.03575	0	-0.26	-1.2	0.00201	0.00583	0	-0.08	-1.06	0.348	0.415	0	-332.34
IL12B	-0.6	-1.51	0.0757	0.28865	0	-0.8	-1.74	0.017	0.0341	0	1.41	2.66	4.87e-05	0.000112	1	56.52
DKK4	-0.35	-1.27	0.313	0.4967	0	-0.71	-1.64	0.0383	0.0665	0	1.5	2.83	2.93e-05	7.33e-05	1	47.41
EDA2R	-0.11	-1.08	0.00531	0.10464	0	-0.13	-1.1	0.00071	0.0026	0	0.03	1.02	0.491	0.562	0	499.94
LAT	-0.13	-1.1	0.342	0.50416	0	-0.13	-1.1	0.335	0.403	0	-0.01	-1.01	0.923	0.946	0	-993.31
NTRK3	-0.22	-1.16	0.00986	0.12892	0	-0.17	-1.12	0.0425	0.0727	0	-0.02	-1.01	0.815	0.865	0	-866.48
LAIR2	-0.4	-1.32	0.00785	0.12554	0	-0.71	-1.63	3.9e-06	4.81e-05	0	0.58	1.49	0.000151	0.000316	0	122.61
MANF	-0.23	-1.18	0.0788	0.29284	0	-0.36	-1.28	0.00667	0.0159	0	0.49	1.4	0.00035	0.000712	0	74.02
TNR	-0.15	-1.11	0.0209	0.18624	0	-0.15	-1.11	0.0157	0.0319	0	-0.09	-1.06	0.175	0.22	0	-177.7
CD200R1	-0.4	-1.32	0.00531	0.10464	0	-0.83	-1.77	3.69e-08	2.57e-06	0	0.58	1.5	6.69e-05	0.000152	0	141.65
NRCAM	-0.23	-1.17	0.0523	0.22657	0	-0.38	-1.3	0.00168	0.00499	0	0.4	1.32	0.00105	0.00197	0	94.62
KYNU	-1	-2	0.0691	0.27811	0	-1.51	-2.86	0.00592	0.0143	-1	2.85	7.19	9.37e-07	3.77e-06	1	53.22
